# Supplementary material for: Laser Ablation of NiFe2O4 and CoFe2O4 Nanoparticles
Source: MDPI journal article supplement (doi:10.3390/nano12111872), 2022-05-30
Supplement: s1 [file s1]

## Supplementary Materials

### Laser Ablation of $\text{NiFe}_2\text{O}_4$ and $\text{CoFe}_2\text{O}_4$ Nanoparticles

Erik Sachse <sup>1</sup>, Marianela Escobar-Castillo <sup>1,\*</sup>, Friedrich Waag <sup>2</sup>, Bilal Gökce <sup>2,3</sup>, Soma Salamon <sup>4</sup>, Joachim Landers <sup>4</sup>, Heiko Wende <sup>4</sup> and Doru C. Lupascu <sup>1</sup>

<sup>1</sup> Institute for Materials Science and Center for Nanointegration Duisburg-Essen (CENIDE), University of Duisburg-Essen, 45141 Essen, Germany; erik.sachse@web.de (E.S.); doru.lupascu@uni-due.de (D.C.L.)

<sup>2</sup> Technical Chemistry I and Center for Nanointegration Duisburg-Essen (CENIDE), University of Duisburg-Essen, 45141 Essen, Germany; friedrich.waag@uni-due.de (F.W.); goekce@uni-wuppertal.de (B.G.)

<sup>3</sup> Materials Science and Additive Manufacturing, University of Wuppertal, 42119 Wuppertal, Germany

<sup>4</sup> Faculty of Physics and Center for Nanointegration Duisburg-Essen (CENIDE), University of Duisburg-Essen, 47057 Duisburg, Germany; soma.salamon@uni-due.de (S.S.); joachim.landiers@uni-due.de (J.L.); heiko.wende@uni-due.de (H.W.)

\* Correspondence: marianela.escobar@uni-due.de

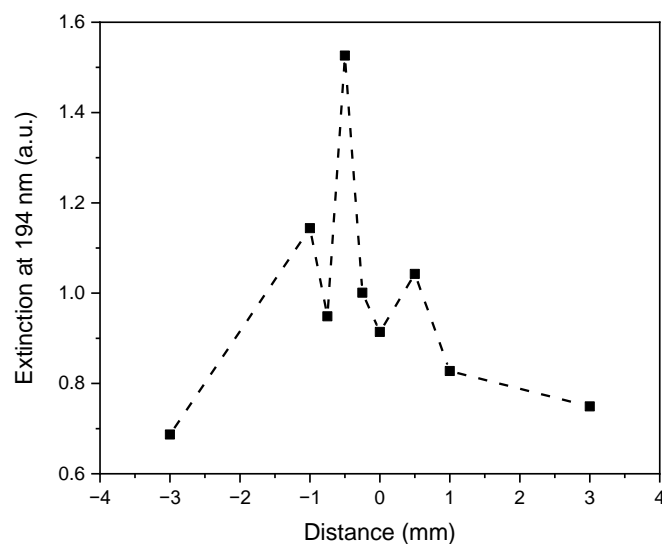

**Figure S1.** Variation of the target surface distance from the focal position of the laser beam for the determination of the optimal distance in LAL process.

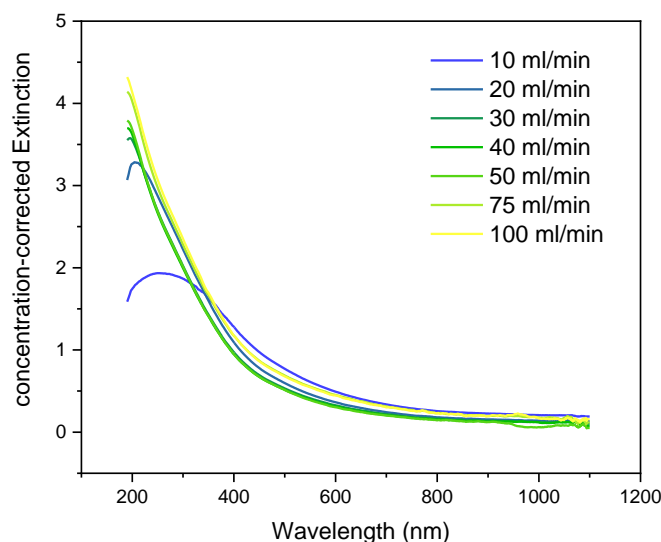

**Figure S2.** Variation of the colloid volume flow to determine the best nanoparticles productivity. Best volume flow at 40 ml/min, which shows high particle concentration with a curve maxima that is still in the measured range.

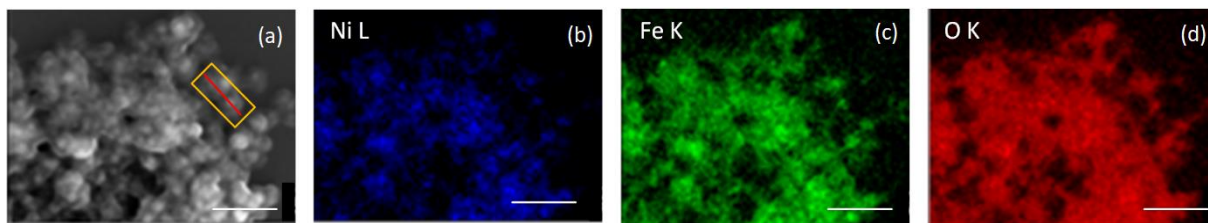

**Figure S3.** SEM Image of NFO NPs (a) and corresponding element mapping (b,c,d). Red marked line in (a) represent EDX scanned area to determine the Ni:Fe:O molar ratio. Obtained atom% values:  $14.1 \pm 0.1$  for Ni,  $27.5 \pm 0.3$  for Fe and  $58.3 \pm 0.3$  for O. Bar represents 500nm.

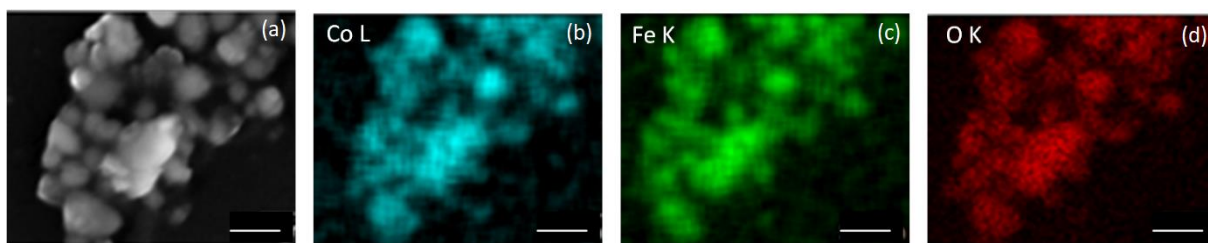

**Figure S4.** SEM image of CFO NPs (a) and corresponding element mapping (b,c,d). Bar represents 250nm.

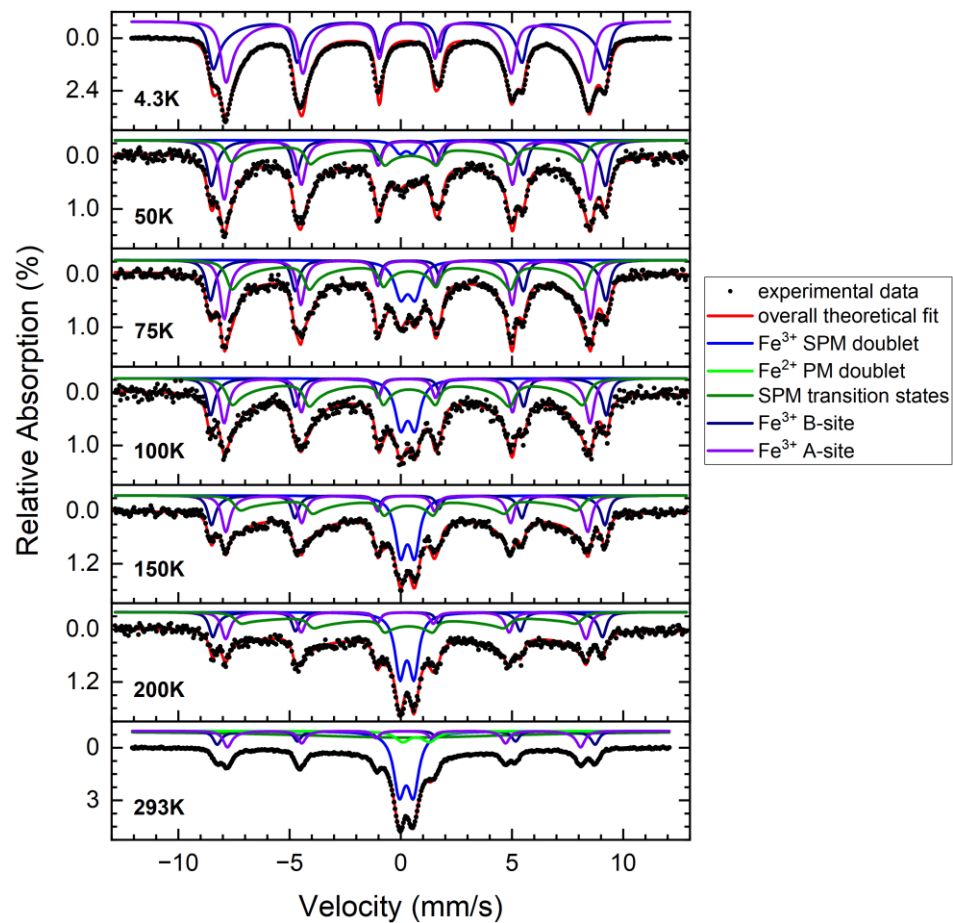

**Figure S5.** Mössbauer spectra of NFO recorded at temperatures between 4.3 K and 293 K in order to discern the temperature dependent evolution of  $\text{Fe}^{2+}$  contribution.

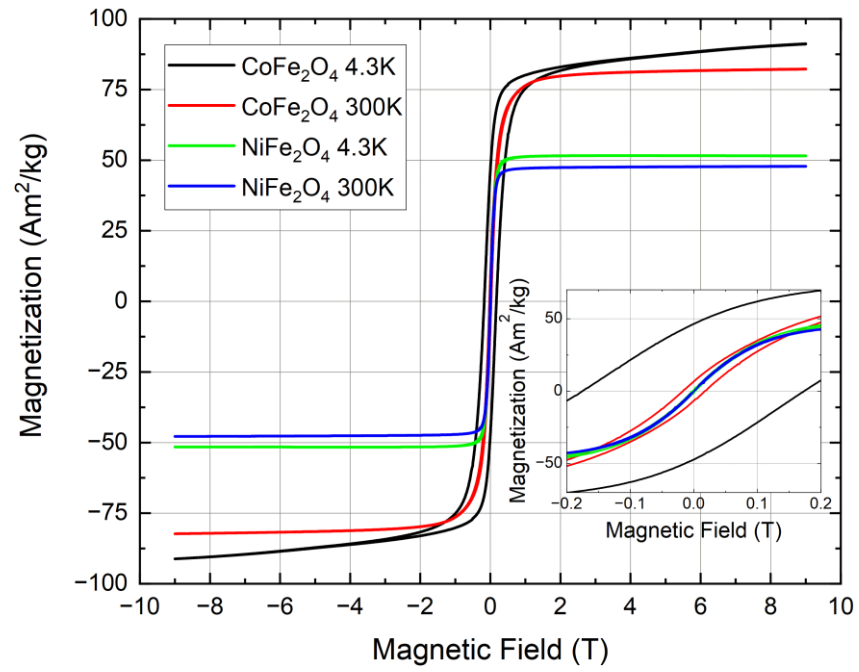

**Figure S6.** Magnetic measurements of NFO- and CFO ceramic targets at 4.3 K and 300 K.
